# Supplementary material for: Identification of the Roles of a Stemness Index Based on mRNA Expression in the Prognosis and Metabolic Reprograming of Pancreatic Ductal Adenocarcinoma
Source: Front Oncol. 2021 Apr 12;11:643465. doi: 10.3389/fonc.2021.643465 (PMC8071957; doi:10.3389/fonc.2021.643465)
Supplement: Supplementary file 6 [file Table_1.xlsx]

## Sheet: Sheet1
Supplementary table 1. Genes involved in different metabolic pathways.
Pathway	Sub-pathway	Genes
KEGG_ARGININE_AND_PROLINE_METABOLISM	> Arginine and proline metabolism	AGMAT	ALDH18A1	ALDH1B1	ALDH2	ALDH3A2	ALDH4A1	ALDH7A1	ALDH9A1	AMD1	AOC1	ARG1	ARG2	ASL	ASS1	AZIN2	CKB	CKM	CKMT1A	CKMT1B	CKMT2	CPS1	DAO	GAMT	GATM	GLS	GLS2	GLUD1	GLUD2	GLUL	GOT1	GOT2	LAP3	MAOA	MAOB	NAGS	NOS1	NOS2	NOS3	OAT	ODC1	OTC	P4HA1	P4HA2	P4HA3	PRODH	PRODH2	PYCR1	PYCR2
REACTOME_BRANCHED_CHAIN_AMINO_ACID_CATABOLISM	> Branched-chain amino acid catabolism	ACAD8	ACADSB	ACAT1	ALDH6A1	AUH	BCAT1	BCAT2	BCKDHA	BCKDHB	BCKDK	DBT	DLD	ECHS1	HIBADH	HIBCH	HSD17B10	IVD	MCCC1	MCCC2	PPM1K	SLC25A44
KEGG_GLYCINE_SERINE_AND_THREONINE_METABOLISM	> Glycine, serine and threonine metabolism	AGXT	AGXT2	ALAS1	ALAS2	AMT	AOC2	AOC3	BHMT	CBS	CHDH	CTH	DAO	DLD	DMGDH	GAMT	GATM	GCAT	GLDC	GLYCTK	GNMT	MAOA	MAOB	PHGDH	PIPOX	PSAT1	PSPH	SARDH	SDS	SHMT1	SHMT2	SRR
REACTOME_TRIGLYCERIDE_BIOSYNTHESIS	> Triglyceride biosynthesis	AGMO	DGAT1	DGAT2	GK	GK2	GK3P	GPAM	GPAT2	LPIN1	LPIN2	LPIN3	MOGAT1	MOGAT2	MOGAT3
REACTOME_GLUTAMATE_AND_GLUTAMINE_METABOLISM	> Glutamate and glutamine metabolism	ALDH18A1	GLS	GLS2	GLUD1	GLUD2	GLUL	GOT2	KYAT1	OAT	PYCR1	PYCR2	PYCR3	RIMKLA	RIMKLB
REACTOME_GLUTATHIONE_SYNTHESIS_AND_RECYCLING	> Glutathione synthesis and recycling	CHAC1	CHAC2	CNDP2	GCLC	GCLM	GGCT	GGT1	GGT5	GGT6	GGT7	GSS	OPLAH
KEGG_PENTOSE_PHOSPHATE_PATHWAY	> Pentose phosphate pathway	ALDOA	ALDOB	ALDOC	DERA	FBP1	FBP2	G6PD	GPI	H6PD	PFKL	PFKM	PFKP	PGD	PGLS	PGM1	PGM2	PRPS1	PRPS1L1	PRPS2	RBKS	RPE	RPEL1	RPIA	TALDO1	TKT	TKTL1	TKTL2
REACTOME_PHOSPHOLIPID_METABOLISM	> Phospholipid metabolism	ABHD3	ABHD4	ACHE	ACP6	AGK	AGPAT1	AGPAT2	AGPAT3	AGPAT4	AGPAT5	ALPI	ARF1	ARF3	AWAT2	BCHE	BMX	CDIPT	CDS1	CDS2	CEPT1	CHAT	CHKA	CHKB	CHPT1	CPNE1	CPNE3	CPNE6	CPNE7	CRLS1	CSNK2A1	CSNK2A2	CSNK2B	DDHD1	DDHD2	DGAT1	DGAT2	DGAT2L6	ENPP6	ETNK1	ETNK2	ETNPPL	FIG4	GDE1	GDPD1	GDPD3	GDPD5	GNPAT	GPAM
REACTOME_GLUCONEOGENESIS	> Gluconeogenesis	ALDOA	ALDOB	ALDOC	ENO1	ENO2	ENO3	FBP1	FBP2	G6PC	G6PC2	G6PC3	GAPDH	GAPDHS	GOT1	GOT2	GPI	MDH1	MDH2	PC	PCK1	PCK2	PGAM1	PGAM2	PGK1	PGK2	SLC25A1	SLC25A10	SLC25A11	SLC25A12	SLC25A13	SLC37A1	SLC37A2	SLC37A4	TPI1
KEGG_OXIDATIVE_PHOSPHORYLATION	> Oxidative phosphorylation	AL929410.2	ATP12A	ATP4A	ATP4B	ATP5F1A	ATP5F1B	ATP5F1C	ATP5F1D	ATP5F1E	ATP5MC1	ATP5MC1P5	ATP5MC2	ATP5MC3	ATP5ME	ATP5MF	ATP5MG	ATP5PB	ATP5PD	ATP5PF	ATP5PO	ATP6AP1	ATP6V0A1	ATP6V0A2	ATP6V0A4	ATP6V0B	ATP6V0C	ATP6V0D1	ATP6V0D2	ATP6V0E1	ATP6V0E2	ATP6V1A	ATP6V1B1	ATP6V1B2	ATP6V1C1	ATP6V1C2	ATP6V1D	ATP6V1E1	ATP6V1E2	ATP6V1F	ATP6V1G1	ATP6V1G2	ATP6V1G3	ATP6V1H	COX10	COX11	COX15	COX17	COX4I1
REACTOME_NR1H2_NR1H3_REGULATE_GENE_EXPRESSION_LINKED_TO_TRIGLYCERIDE_LIPOLYSIS_IN_ADIPOSE	> NR1H2 & NR1H3 regulate gene expression linked to triglyceride lipolysis in adipose	NR1H2	NR1H3	PLIN1	RXRA	RXRB
REACTOME_GLYCOLYSIS	> Glycolysis	AAAS	ADPGK	ALDOA	ALDOB	ALDOC	BPGM	ENO1	ENO2	ENO3	GAPDH	GAPDHS	GCK	GCKR	GNPDA1	GNPDA2	GPI	HK1	HK2	HK3	NDC1	NUP107	NUP133	NUP153	NUP155	NUP160	NUP188	NUP205	NUP210	NUP214	NUP35	NUP37	NUP42	NUP43	NUP50	NUP54	NUP58	NUP62	NUP85	NUP88	NUP93	NUP98	PFKFB1	PFKFB2	PFKFB3	PFKFB4	PFKL	PFKM	PFKP
[truncated: 163 more columns]
